# Supplementary material for: Identification of Bile Salt Hydrolase and Bile Salt Resistance in a Probiotic Bacterium Lactobacillus gasseri JCM1131T
Source: MDPI journal article supplement (doi:10.3390/microorganisms9051011), 2021-05-08
Supplement: s1 [file s1]

## Supplementary Materials

# Identification of Bile Salt Hydrolase and Bile Salt Resistance in a Probiotic Bacterium *Lactobacillus gasseri* JCM1131<sup>T</sup>

Hiroyuki Kusada <sup>1,\*</sup>, Kana Morinaga <sup>1</sup> and Hideyuki Tamaki <sup>1,2,\*</sup>

<sup>1</sup> Bioproduction Research Institute, National Institute of Advanced Industrial Science and Technology, Tsukuba, Ibaraki, 305-8566, Japan; k.morinaga@aist.go.jp

<sup>2</sup> Faculty of Life and Environmental Sciences, University of Tsukuba, Tsukuba, Ibaraki, 305-8572, Japan

\* Correspondence: kusada-hiroyuki@aist.go.jp (H.K.); tamaki-hideyuki@aist.go.jp (H.T.); Tel.: +81-29-861-6591 (H.K.); +81-29-861-6592 (H.T.); Fax: +81-29-861-6587 (H.K. & H.T.)

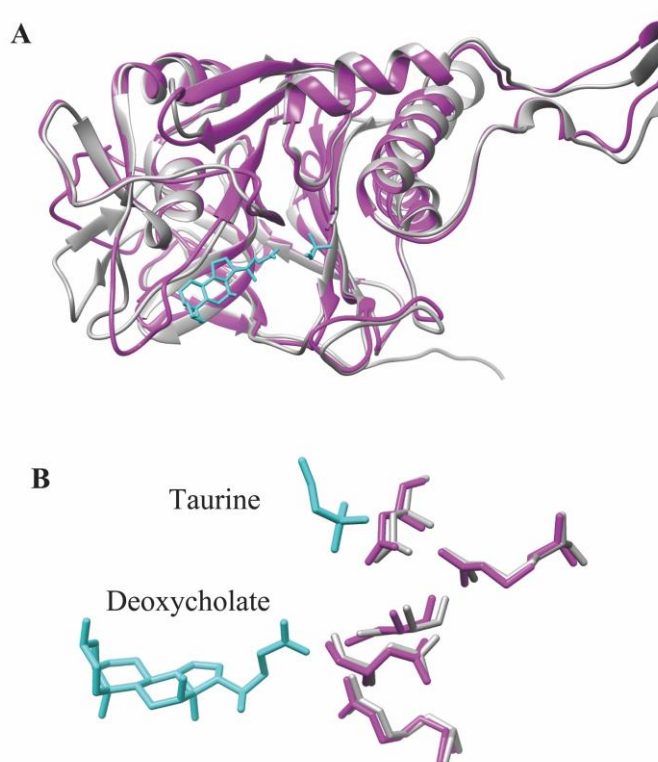

**Figure S1.** Structural analyses of LagBSH. Overall (A) and active site (B) structural superposition of LagBSH (magenta) with CpBSH from *Clostridium perfringens* 13 (light gray; PDB entry 2BJF). Taurine and deoxycholate molecules were shown in cyan stick.

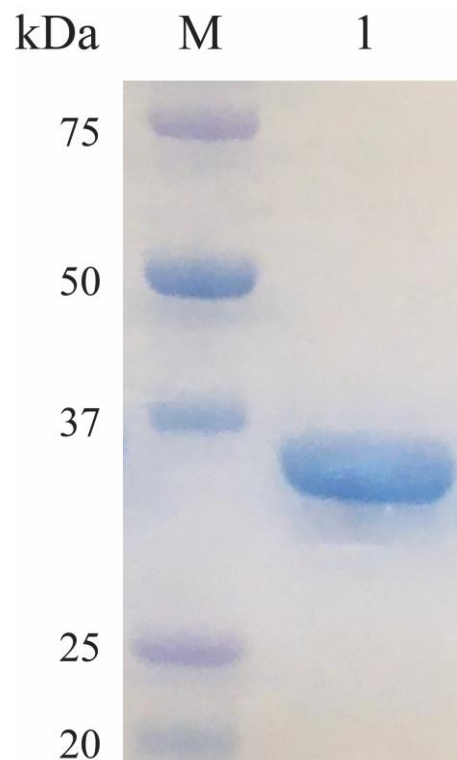

**Figure S2.** SDS-PAGE analysis of purified LagBSH. After nickel affinity chromatography, purified protein was loaded on 12% SDS-PAGE gel (Bio-Rad). Lane M, molecular size-marker (Precision Plus Protein™ Dual Color Standards, 10-250 kDa); lane 1, LagBSH.

**Table S1.** The BSH sequence homology among *Lactobacillus* species.

| Species               | Strain       | Accession No | Amino acid sequence homology (%) |
|-----------------------|--------------|--------------|----------------------------------|
|                       |              |              | LagBSH                           |
| <i>L. acidophilus</i> | NCFM         | YP_193782    | 33.33                            |
| <i>L. acidophilus</i> | NCFM         | AAV42923     | 35.00                            |
| <i>L. animalis</i>    | unknown      | WP_010690294 | 37.30                            |
| <i>L. buchneri</i>    | NRRL B-30929 | AEB72500     | 29.69                            |
| <i>L. fermentum</i>   | NCDO 394     | AEZ06356     | 29.06                            |
| <i>L. gasseri</i>     | FR4          | WP_020806888 | 39.94                            |
| <i>L. johnsonii</i>   | PF01         | ABQ01980     | 93.35                            |
| <i>L. johnsonii</i>   | 100-100      | AF297873     | 39.20                            |
| <i>L. johnsonii</i>   | 100-100      | AAC34381     | 93.99                            |
| <i>L. johnsonii</i>   | NCC533       | AAS09178     | 38.58                            |
| <i>L. johnsonii</i>   | NCC533       | AAS08969     | 32.91                            |
| <i>L. johnsonii</i>   | NCC533       | AAS08038     | 93.67                            |
| <i>L. plantarum</i>   | MBUL69       | ACG76118     | 38.05                            |
| <i>L. plantarum</i>   | WCFS1        | CCC80500     | 37.74                            |
| <i>L. plantarum</i>   | LP80         | S51638       | 37.74                            |
| <i>L. plantarum</i>   | ST-III       | ADO00098     | 37.74                            |
| <i>L. plantarum</i>   | ST-III       | ADN97280     | 30.32                            |
| <i>L. plantarum</i>   | ST-III       | ADN99975     | 30.67                            |
| <i>L. plantarum</i>   | ST-III       | ADN99333     | 27.84                            |
| <i>L. reuteri</i>     | 100-23       | EDX41535     | 36.62                            |
| <i>L. salivarius</i>  | UCC118       | YP_536688    | 37.07                            |
| <i>L. salivarius</i>  | NRRL B-30514 | JX120368     | 37.38                            |
| <i>L. salivarius</i>  | JCM1046      | ACL98204     | 37.03                            |
